# Supplementary material for: Mesoporous titania nanostructures thermally stabilized by doping with “sodium oxide”†
Source: Royal Society of Chemistry journal article supplement (doi:10.1039/b106649h), 2001-01-01
Supplement: b106649h.doc [file b106649h.doc]

#### Electronic Supplementary Information

**Mesoporous titania nanostructures thermally stabilized by doping "sodium oxide"**

**Quanchang Li, Peter Härter*, Wen-Mei Xue, Jing-Lin Zuo and Wolfgang A. Herrmann**

*Anorganisch-Chemisches Institut, Technische Universität München, Lichtenbergstrasse 4, D-85747 Garching b. München, Germany. E-mail: peter.haerter@ch.tum.de*

#### Synthesis of the “Na2O” doped mesoporous titania

#### A mixture of titanium isopropoxide (Aldrich, 17 g, 60 mmol) and 1-dodecylamine (Merck, 11 g, 60 mmol) was stirred at room temperature until a homogeneous yellow solution was obtained (ca. 30 min.) Distilling off the generated isopropanol led to the formation of complex Ti(OC3H7)3[HN(CH2)11CH3]. Calcd. for C21H47NO3Ti (408.9): C, 61.60; H, 11.57; N, 3.42; Ti, 11.69. Found: C, 61.59; H, 12.29; N, 3.10; Ti, 10.27. 1H-NMR (400 MHz, CDCl3): 0.84 (t, 3H), 0.98 (s, 1H), 1.22 (t, 37H), 1.39 (m, 2H), 2.63 (t, 2H), 4.45 (m, 3H).

#### To the complex described above was added 150 ml of isopropanol and subsequently 150 ml of water, white precipitate formed immediately. After the mixture was aged at room temperature for 1 day and at 80 °C for 5 days, the as-synthesized material was collected by suction filtration, washed with water, ethanol and diethyl ether, and dried in an oven at 120 °C for 1 day. IR (KBr, cm-1): 3415 (br), 2923 (vs), 2854 (s), 1631 (m), 1462 (m), 677 (s), 485 (s). Found: C, 34.74; H, 6.67; N, 3.00. The TGA analysis reveals a weight loss of 43.8% between 210 °C and 570 °C, correspondent to the content of surfactant in the material. The XRD shows a single broad reflection (100) centered at d = 3.2 nm.

2.5 g of the as-synthesized material was added to a solution of 4.1 g of phosphoric acid in 120 ml of water and 120 ml of ethanol (pH = 0.5). The mixture was stirred at room temperature for 2 h. The solid was collected by suction filtration, washed with water until a pH value of 7 was reached, and then washed with ethanol and diethyl ether, and dried in an oven at 120 °C for 2 h. IR (KBr, cm-1): 3418 (br), 2961 (m), 2920 (s), 2850 (m), 1630 (m), 1468 (m), 1024 (vs), 512 (s). Found: C, 20.77; H, 4.61; N, 2.01. The TGA analysis indicates that ca. 29.7% of the surfactant is retained. The XRD shows a single broad reflection at d = 3.6 nm.

2.2 g of the phosphoric acid treated sample was treated with 100 ml of aqueous NaOH solution (10%) overnight. Then the solid was collected by suction filtration, washed with water and ethanol, dried in an oven at 120 °C for 2 h. IR and TGA indicated that exhaustively washing with water removed all phosphate and partial surfactants. It was nevertheless found that sodium was introduced into the material even when exhaustive washing with water until a pH of 7 was reached. IR (KBr, cm-1): 3416 (br), 1630 (m), 1400 (w), 526 (br). The TGA analysis shows 7.8% of surfactant remained in the sample. The XRD shows a single peak at d = 5.7 nm. The BET surface area of this sample is 587 m2g-1, and the average pore diameter is 3.4 nm. After calcination at 350 °C, the remained surfactants were completely removed and the “Na2O” doped mesoporous titania was obtained. Found: C, 0.27; H, 0.86; N, 0.05; Na, 4.9; P, 0.06; Ti, 47.0. The TGA only shows desorption of physiadsorbed water. The DSC shows an exothermal peak at 530 °C. The XRD shows a single reflection at d = 5.7 nm. The BET surface area is about 334 m2g-1, the pore volume is 0.301 cm3g-1. The pore size distribution is narrow and the average pore diameter is 3.2 nm that is determined according to the BJH desorption branch of BJH method.

The Na content in the material can be tuned by controlling the pH value of the water filtrate. The materials with various sodium contents, e.g. 5.5% and 7.1%, were obtained.

“Na2O” doped mesoporous titania containing 5.5% of Na. Found: C, 0.24; H, 0.23; N, 0.06; Na, 5.5; P, 0.08; Ti, 52.24. The TGA only shows desorption of physiadsorbed water. The DSC shows an exothermal peak at 550 °C. The XRD shows a single reflection at d = 5.7 nm. The BET surface area is about 390 m2g-1, the pore volume is 0.301 cm3g-1. The pore size distribution is narrow and the average pore diameter is 3.0 nm that is determined according to the BJH desorption branch of BJH method.

“Na2O” doped mesoporous titania containing 7.1% of Na. Found: C, 0.43; H, 0.73; N, 0.00; Na, 7.1; P, 0.02; Ti, 48.8. The TGA only shows desorption of physiadsorbed water. The DSC shows an exothermal peak at 575 °C. The XRD shows a single reflection at d = 5.7 nm. The BET surface area is about 301 m2g-1, the pore volume is 0.265 cm3g-1. The pore size distribution is narrow and the average pore diameter is 3.3 nm that is determined according to the BJH desorption branch of BJH method.

**Powder X-ray Diffraction (XRD)**

X-ray powder diffraction spectra were recorded on a Huber G600 diffractometer using Cu-K radiation ( = 1.54 Å) and a scintillation detector.

Figure 1 compares the X-ray diffraction patterns of the as-synthesized mesoporous titania containing 1-dodecylamine, the phosphoric acid-treated sample, the NaOH-treated sample, the calcined mesoporous titania doped with "Na2O" (Na wt.% = 5.5%), and the background.

Figure 2 presents the XRD of the calcined “Na2O” doped mesoporous titania (Na wt.% = 5.2%) in the range of 2 = 0–80°, compared with the background. It has to be noted that the intensity of the sodium titanate refelections is not high due to the low content of sodium in the material. The characteristic Na2Ti6O13 XRD reflections at 2 = 11.84 and 24.50° overlap with the grease background. However, the reflection at 2 = 48.46° is clearly identified.
