# Supplementary figures and images for: Mesoporous titania nanostructures thermally stabilized by doping with “sodium oxide”†
Source: Royal Society of Chemistry journal article supplement (doi:10.1039/b106649h), 2001-01-01

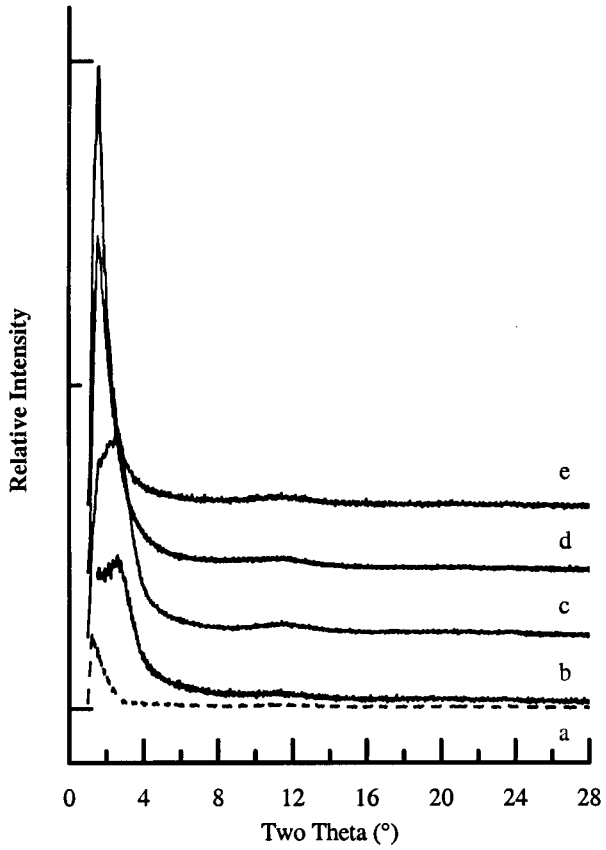

Supplement: fig1.pdf [file fig1.pdf]

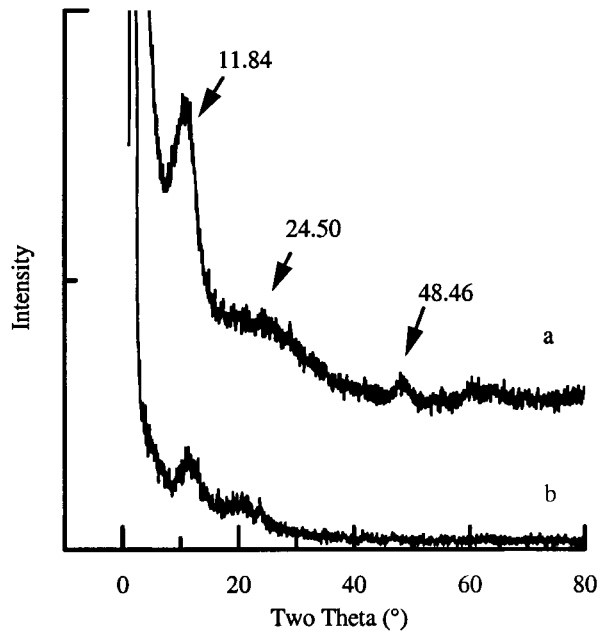

Supplement: fig2.pdf [file fig2.pdf]

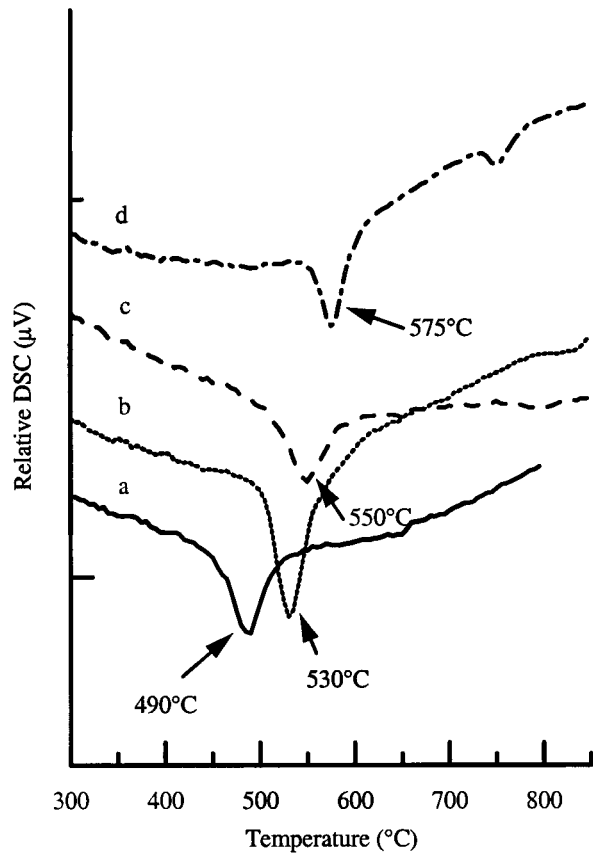

Supplement: fig3.pdf [file fig3.pdf]
